# Supplementary material
Source: PubMed Central journal article supplement (PMC5930887)
Supplement: tpmd170440.SD1.pdf [file tpmd170440.SD1.pdf]

SUPPLEMENTAL TABLE 1  
Safe Drinking Water Compliance Framework adapted to purchased *garrafon*-bottled water

| Components    | Operational definitions                                                                                                     | Measurement                                                                                                                                        |
|---------------|-----------------------------------------------------------------------------------------------------------------------------|----------------------------------------------------------------------------------------------------------------------------------------------------|
| Adoption      |                                                                                                                             |                                                                                                                                                    |
| Procurement   | Household possessed <i>garrafon</i> -bottled water                                                                          | Verified presence of <i>garrafon</i>                                                                                                               |
| Consumption   | Not documented                                                                                                              | Not applicable                                                                                                                                     |
| Knowledge     |                                                                                                                             |                                                                                                                                                    |
| Procurement   | Interviewee knew how and where to get <i>garrafon</i> -bottled water                                                        | Interviewee reported location where <i>garrafon</i> -bottled water could be obtained                                                               |
| Consumption   | Interviewee recognized <i>garrafon</i> -bottled water as being of better quality than untreated water                       | Interviewee provided information on <i>garrafon</i> -bottled water quality with respect to other sources                                           |
| Access        |                                                                                                                             |                                                                                                                                                    |
| Procurement   | <i>Garrafon</i> -bottled water could be purchased within 1 km from household (UN human right to water standard before 2016) | Data on <i>garrafon</i> -bottled water distributors in the region                                                                                  |
| Consumption   | <i>Garrafon</i> -bottled water was present in the home                                                                      | Interviewer verified presence of water and interviewee confirmed source                                                                            |
| Habit         |                                                                                                                             |                                                                                                                                                    |
| Procurement   | Household members obtained <i>garrafon</i> -bottled water at least once every 5 days                                        | Interviewee reported frequency of purchase                                                                                                         |
| Consumption   | Interviewee's last glass of water came from, and her/his most common drinking source was, <i>garrafon</i> -bottled water    | Interviewer recorded from where interviewee had drunk his/her last glass of water. Interviewer also recorded most common source of drinking water. |
| Exclusive use |                                                                                                                             |                                                                                                                                                    |
| Procurement   | Not documented                                                                                                              | Not applicable                                                                                                                                     |
| Consumption   | Interviewee consumed only <i>garrafon</i> -bottled water while in her/his household during the past 7 days                  | Interviewer walked interviewee through all water access points in the household and asked if she/he had consumed water from it in the past 7 days  |

SUPPLEMENTAL TABLE 2  
Comparison of baseline characteristics weighted by time contributed to control periods and intervention periods

| Characteristic                            | Baseline | Control periods | Intervention periods |
|-------------------------------------------|----------|-----------------|----------------------|
| Household members (observed person-weeks) | 1,731    | 5,640           | 6,477                |
| Mean age (years)                          | 38       | 39              | 38                   |
| Women                                     | 46%      | 45%             | 46%                  |
| Under 15 years                            | 20%      | 19%             | 21%                  |
| Under 5 years                             | 6%       | 6%              | 6%                   |
| Adults (observed person-weeks)            | 1,382    | 4,569           | 5,105                |
| Traditional ranching activities           | 75%      | 76%             | 74%                  |
| Not working                               | 5%       | 5%              | 5%                   |
| Completed elementary school               | 80%      | 80%             | 80%                  |
| Households (observed household weeks)     | 444      | 1,470           | 1,638                |
| Located on improved road                  | 23%      | 24%             | 23%                  |
| Dirt floor                                | 73%      | 69%             | 76%                  |
| Functional refrigerator                   | 17%      | 14%             | 19%                  |
| Wood burning stove only                   | 37%      | 40%             | 34%                  |
| Adequate sanitation                       | 49%      | 47%             | 50%                  |
| Feces in yard (animal or human)           | 35%      | 36%             | 33%                  |
| Self-reported open defecation             | 10%      | 12%             | 7%                   |

SUPPLEMENTAL TABLE 3  
Comparison of baseline characteristics for Basic and Enhanced program variants

| Characteristic                  | Combined variants | Basic program | Enhanced program |
|---------------------------------|-------------------|---------------|------------------|
| Household members               | 1,731             | 756           | 975              |
| Mean age (years)                | 38                | 41            | 37               |
| Women                           | 46%               | 45%           | 46%              |
| Under 15 years                  | 20%               | 18%           | 22%              |
| Under 5 years                   | 6%                | 6%            | 6%               |
| Adults                          | 1,375             | 619           | 756              |
| Traditional ranching activities | 75%               | 79%           | 71%              |
| Not working                     | 5%                | 4%            | 6%               |
| Completed elementary school     | 80%               | 75%           | 84%              |
| Households                      | 444               | 219           | 225              |
| Located on improved road        | 23%               | 26%           | 21%              |
| Dirt floor                      | 73%               | 83%           | 63%              |
| Functional refrigerator         | 17%               | 24%           | 10%              |
| Wood burning stove only         | 37%               | 30%           | 43%              |
| Adequate sanitation             | 49%               | 63%           | 35%              |
| Feces in yard (animal or human) | 35%               | 35%           | 34%              |
| Self-reported open defecation   | 10%               | 5%            | 15%              |

SUPPLEMENTAL TABLE 4  
Community-level intra-cluster correlations for primary outcomes

| Outcome                                  | Intra-class correlation |
|------------------------------------------|-------------------------|
| Habit: consuming Mesita Azul             | 0.08*                   |
| Habit: consuming Garrafon                | 0.18                    |
| Habit: consuming Garrafon or Mesita Azul | 0.09†                   |

\* ICC = 0.05 when restricted to treatment observations.

† ICC = 0.03 when restricted to treatment observations.
